# Supplementary material
Source: Springer Nature journal article supplement (https://www.springermedizin.de/resource/supplementary/12935_2009_210_MOESM3_ESM.pdf/9541380)

**(A)**

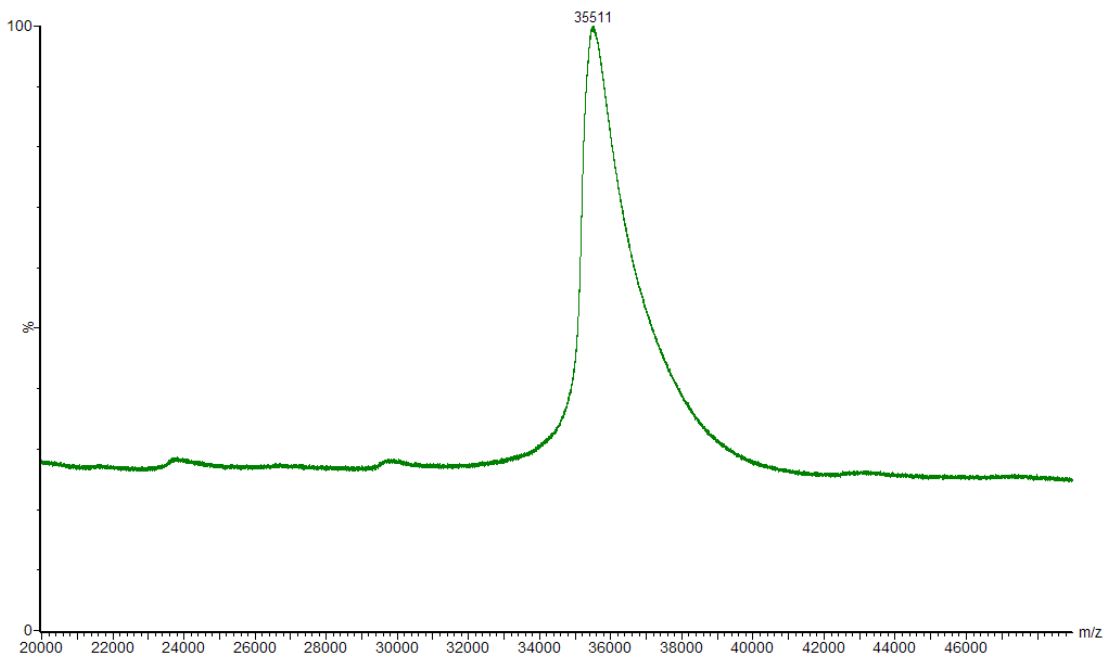

**(B)**

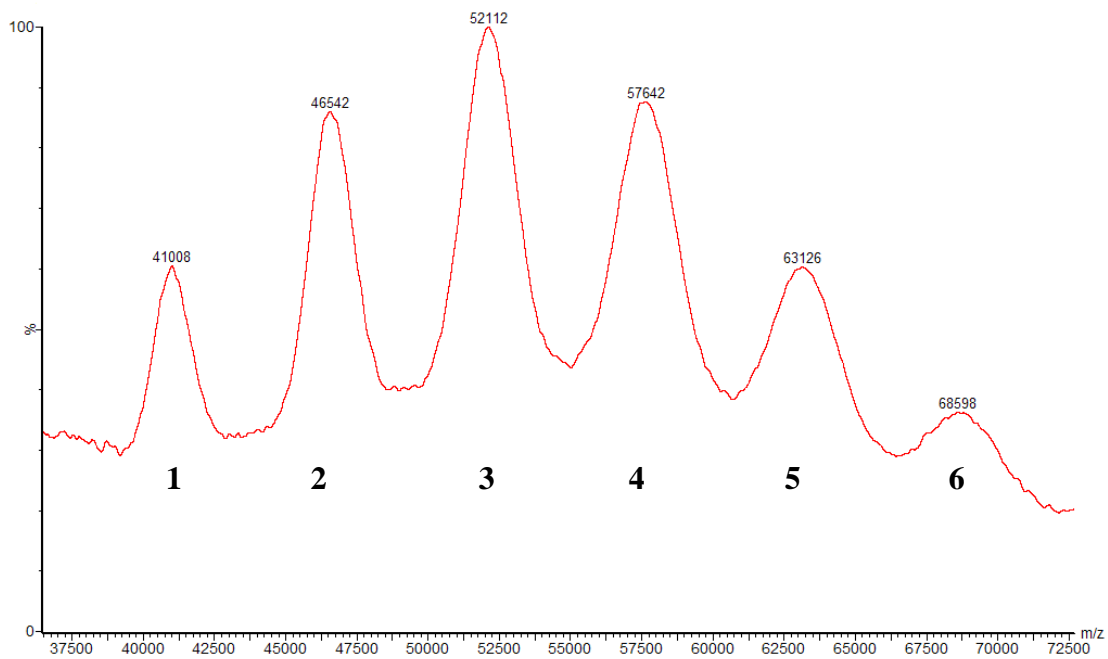

Supplement: MOESM3 [file 9541380]
